# Supplementary material
Source: publisher figshare collection journal article supplement (https://tandf.figshare.com/ndownloader/files/2365582)
Supplement: Supplementary file 1 [file 2365582]

Supplementary material for Kurz et al., Comparing cone-beam CT intensity correction methods for dose recalculation in adaptive intensity modulated photon and proton therapy for head and neck cancer, Acta Oncol, 2015; 54: 1651–1657.

Supplementary Table I. Overview of the investigated patient cohort.

| Patient ID | Tumor site             | TNM stage | $\Delta t_{\text{rpCT-CBCT}}$ (days) | Prescription low/high dose PTV (Gy) | Number of fractions | SFUD gantry angle (degree) |
|------------|------------------------|-----------|--------------------------------------|-------------------------------------|---------------------|----------------------------|
| PatCA1     | Larynx                 | pT2pN0M0  | 1                                    | 50/–                                | 25                  | 45                         |
| PatCA2     | Hypopharynx, esophagus | cT4cN2M0  | 2                                    | 50.4/56                             | 28                  | 45                         |
| PatCA3     | Larynx                 | pT1bN0M0  | 1                                    | 54/60                               | 30                  | 315                        |
| PatCA4     | Hypopharynx            | cT2cN2bM0 | 1                                    | 54/60                               | 30                  | 315                        |
| PatCA5     | Nasopharynx            | cT2cN2bM0 | 0                                    | 54/60                               | 30                  | 315                        |
| PatCA6     | Larynx                 | pT2bpN1M0 | 3                                    | 50.4/56                             | 28                  | 45                         |
| PatCR1     | Paranasal sinus        | pT2cN0M0  | 1                                    | 50.4/61.6                           | 28                  | 270                        |
| PatCR2     | Paranasal sinus        | pT3N2bM0  | 0                                    | 54.4/64                             | 32                  | 0                          |
| PatCR3     | Nasal cavity           | cT3N0M0   | 1                                    | 50.4/56                             | 28                  | 90                         |

For the nine investigated patients of this study, tumor site, TNM stage, dose prescription in the high and low dose PTV for the SIB treatment phase, number of SIB treatment fractions and time delay between rpCT and CBCT acquisition  $\Delta t_{\text{rpCT-CBCT}}$  are given. The gantry angle of the generated SFUD plans is indicated, as well.

Supplementary Table II. OAR dose/volume constraints used during treatment planning.

|                | Dose/volume parameter | Tolerance dose (Gy) |
|----------------|-----------------------|---------------------|
| Spinal cord    | $D_{\text{max}}$      | 53                  |
| Brain stem     | $D_{\text{max}}$      | 53                  |
| Parotids       | $D_{\text{mean}}$     | 26                  |
| Optical nerves | $D_{\text{max}}$      | 54                  |
| Chiasm         | $D_{\text{max}}$      | 56                  |
| Eyes           | $D_{\text{max}}$      | 45                  |
| Eye lenses     | $D_{\text{mean}}$     | 10                  |

For the spinal cord, brain stem, optical nerves and chiasm, PRVs have been considered throughout this study. The optical nerves, chiasm, eyes and eye lenses constraints were only used for PatCR1–3, where these structures were delineated. The tolerance dose levels were chosen similar to the clinical values used for IMRT plan optimization at our institution.

Supplementary Table III. Gamma-index pass-rates for vCT- and CBCT<sub>LUT</sub>-based dose recalculations.

|        | IMRT    |                         | IMPT    |                         |
|--------|---------|-------------------------|---------|-------------------------|
|        | vCT (%) | CBCT <sub>LUT</sub> (%) | vCT (%) | CBCT <sub>LUT</sub> (%) |
| PatCA1 | 96      | 93                      | 95      | 88                      |
| PatCA2 | 91      | 85                      | 76      | 74                      |
| PatCA3 | 97      | 90                      | 95      | 74                      |
| PatCA4 | 96      | 87                      | 93      | 83                      |
| PatCA5 | 95      | 89                      | 90      | 83                      |
| PatCA6 | 94      | 89                      | 88      | 80                      |
| PatCR1 | 99      | 99                      | 94      | 97                      |
| PatCR2 | 99      | 99                      | 98      | 97                      |
| PatCR3 | 89      | 92                      | 93      | 90                      |

For each considered patient the vCT- and CBCT<sub>LUT</sub>-based dose recalculation is compared to the rpCT-based recalculation by a (3%, 3 mm) 3D global gamma criterion.

Supplementary Table IV. BEV range pass-rates for vCT- and CBCT<sub>LUT</sub>-based SFUD dose compared to the rpCT-based calculation.

|        | vCT (%) | CBCT <sub>LUT</sub> (%) |
|--------|---------|-------------------------|
| PatCA1 | 88      | 80                      |
| PatCA2 | 95      | 94                      |
| PatCA3 | 93      | 88                      |
| PatCA4 | 95      | 93                      |
| PatCA5 | 94      | 81                      |
| PatCA6 | 93      | 83                      |
| PatCR1 | 89      | 88                      |
| PatCR2 | 96      | 80                      |
| PatCR3 | 99      | 86                      |

For each patient the vCT- and CBCT<sub>LUT</sub>-based proton SFUD dose recalculation is compared to the rpCT-based recalculation in terms of the proton range in BEV. The depicted values indicate the amount of 1D profiles found within 3 mm of the rpCT.

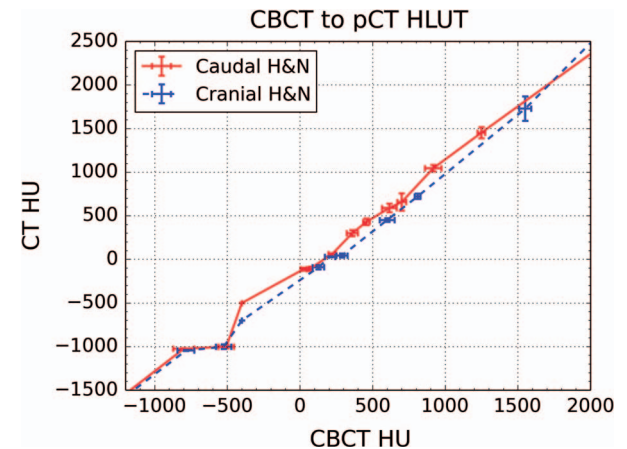

Supplementary Figure 1. HLUTs applied for intensity rescaling of the CBCT to the pCT. The two HLUTs used for patients with caudally (solid) and cranially located (dashed) lesions are depicted. Each data-point corresponds to a population average over multiple corresponding points in the registered pCT and CBCT in a narrow Hounsfield unit (HU) interval. The standard deviation at each point is indicated by error-bars.

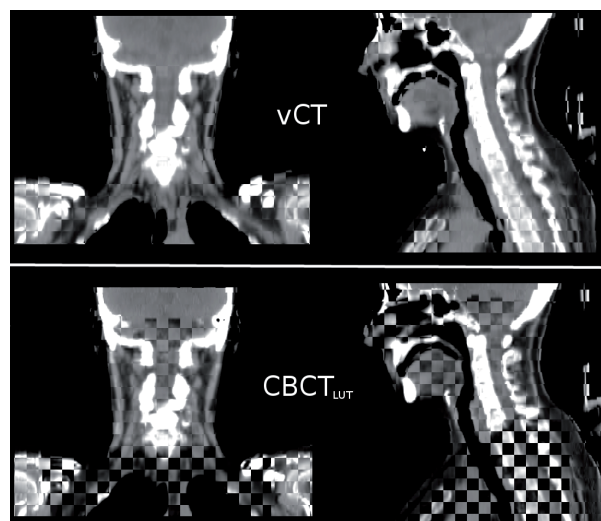

Supplementary Figure 2. Checkerboard display of vCT (upper row) and  $CBCT_{LUT}$  (lower row) against the rpCT of PatCA2.

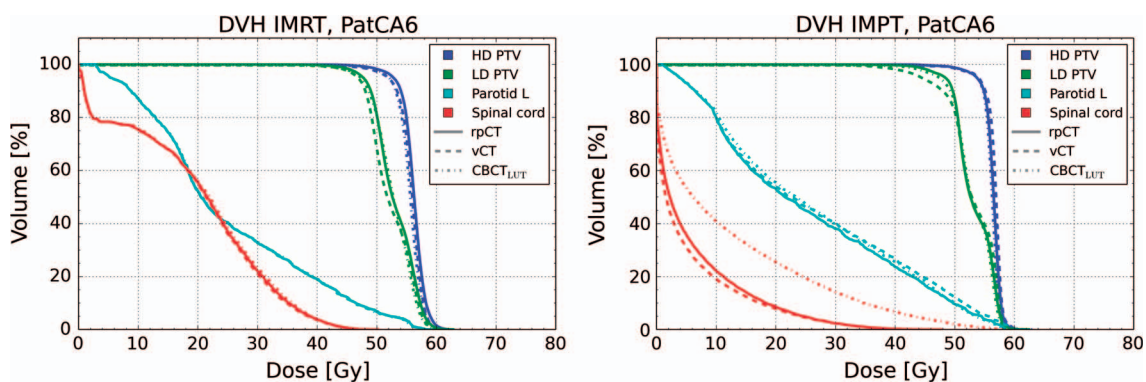

Supplementary Figure 3. DVH comparison of the IMRT (left) and IMPT (right) dose distributions of PatCA6 recalculated on the rpCT (solid line), vCT (dashed) and  $CBCT_{LUT}$  (dotted). For improved visibility, only the high (HD) and low dose (LD) PTV (blue and green), as well as the left parotid (cyan) and the spinal cord (red) are depicted.

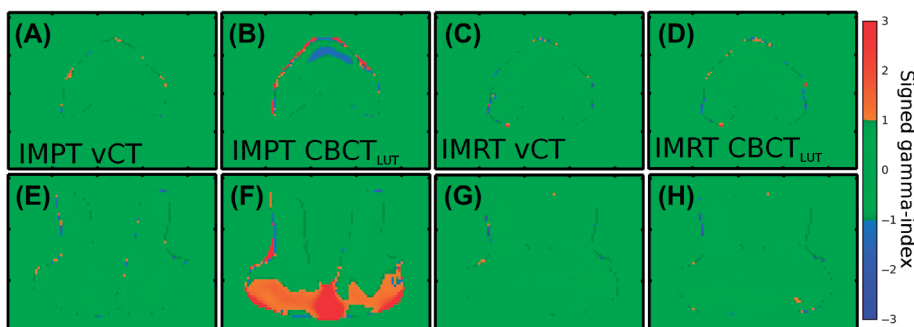

Supplementary Figure 4. Signed gamma-index displayed in a central axial (top row, A–D) and coronal slice (bottom row, E–H) for PatCA3. IMPT recalculations using the vCT (left column, A, E) and  $CBCT_{LUT}$  (center-left column, B, F), as well as IMRT recalculations using the vCT (center-right column, C, G) and  $CBCT_{LUT}$  (right column, D, H) are compared to the corresponding rpCT dose distribution.
